# Supplementary material for: CPEB3 functions as a tumor suppressor in colorectal cancer via JAK/STAT signaling
Source: publisher site journal article supplement (doi:10.18632/aging.103893), 2020-11-03
Supplement: Supplementary file [file aging-v12i21-103893-supplementary-material-SD1.pdf]

**SUPPLEMENTARY FIGURES**

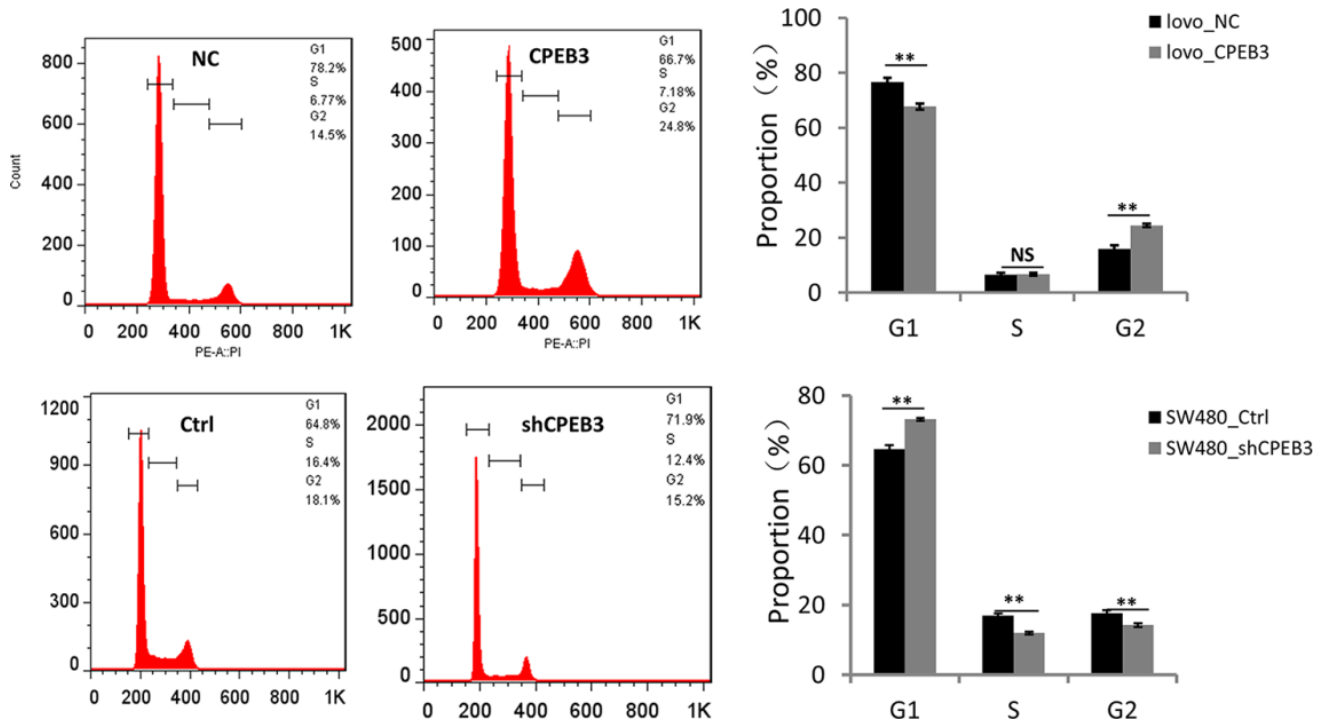

**Supplementary Figure 1. Up-regulation of CPEB3 in LoVo cells results in inhibition of cell cycle progression in G2/M phase as detected by flow cytometry.**

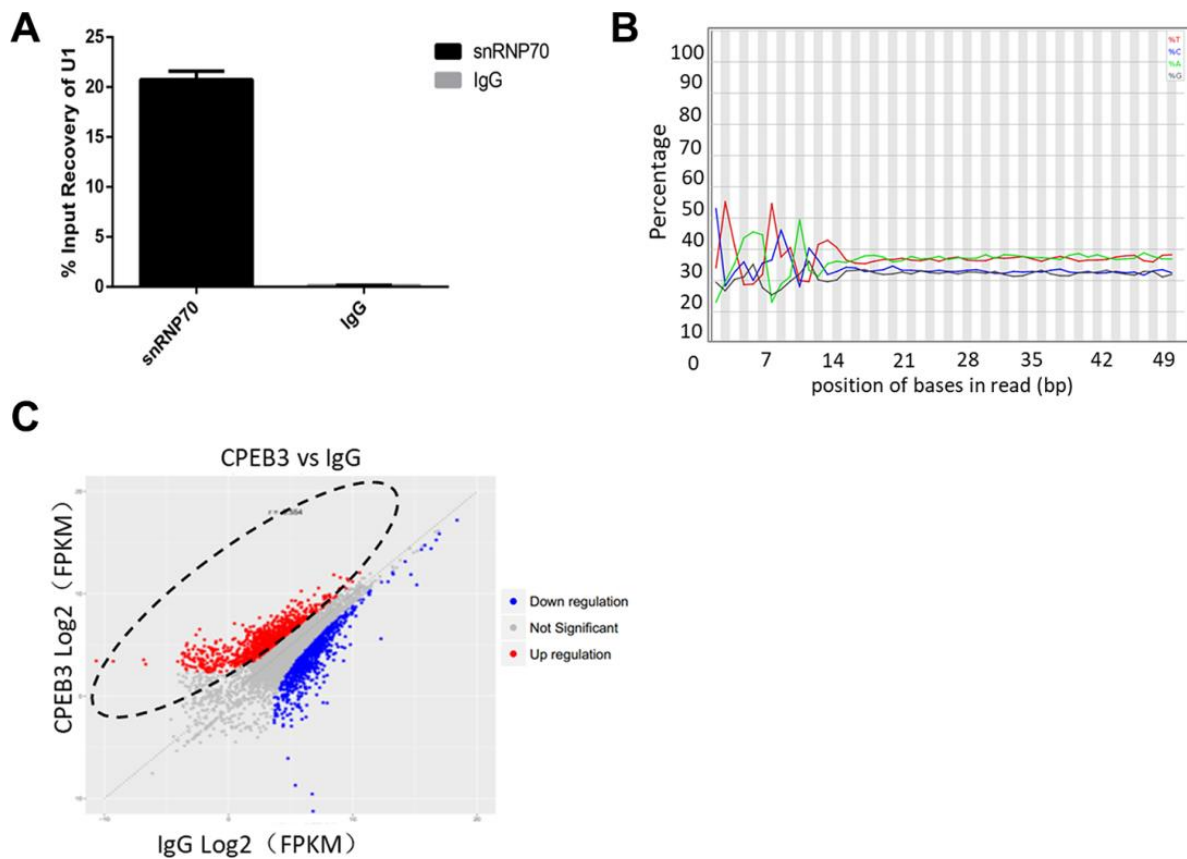

**Supplementary Figure 2. High-throughput sequencing analysis of mRNAs bound to CPEB3 in SW480 cells.** (A) RNA extracts pre-incubated with IgG and SnRNP70 were used as negative and positive controls, respectively. (B) Sequence content across all in CPEB3 group. X axis represents the position of bases in reads (bp) and Y-axis represents the percentage of the bases in each position. (C) Scatter-plot of the read-densities for the mRNAs in the CPEB3 and the IgG group.

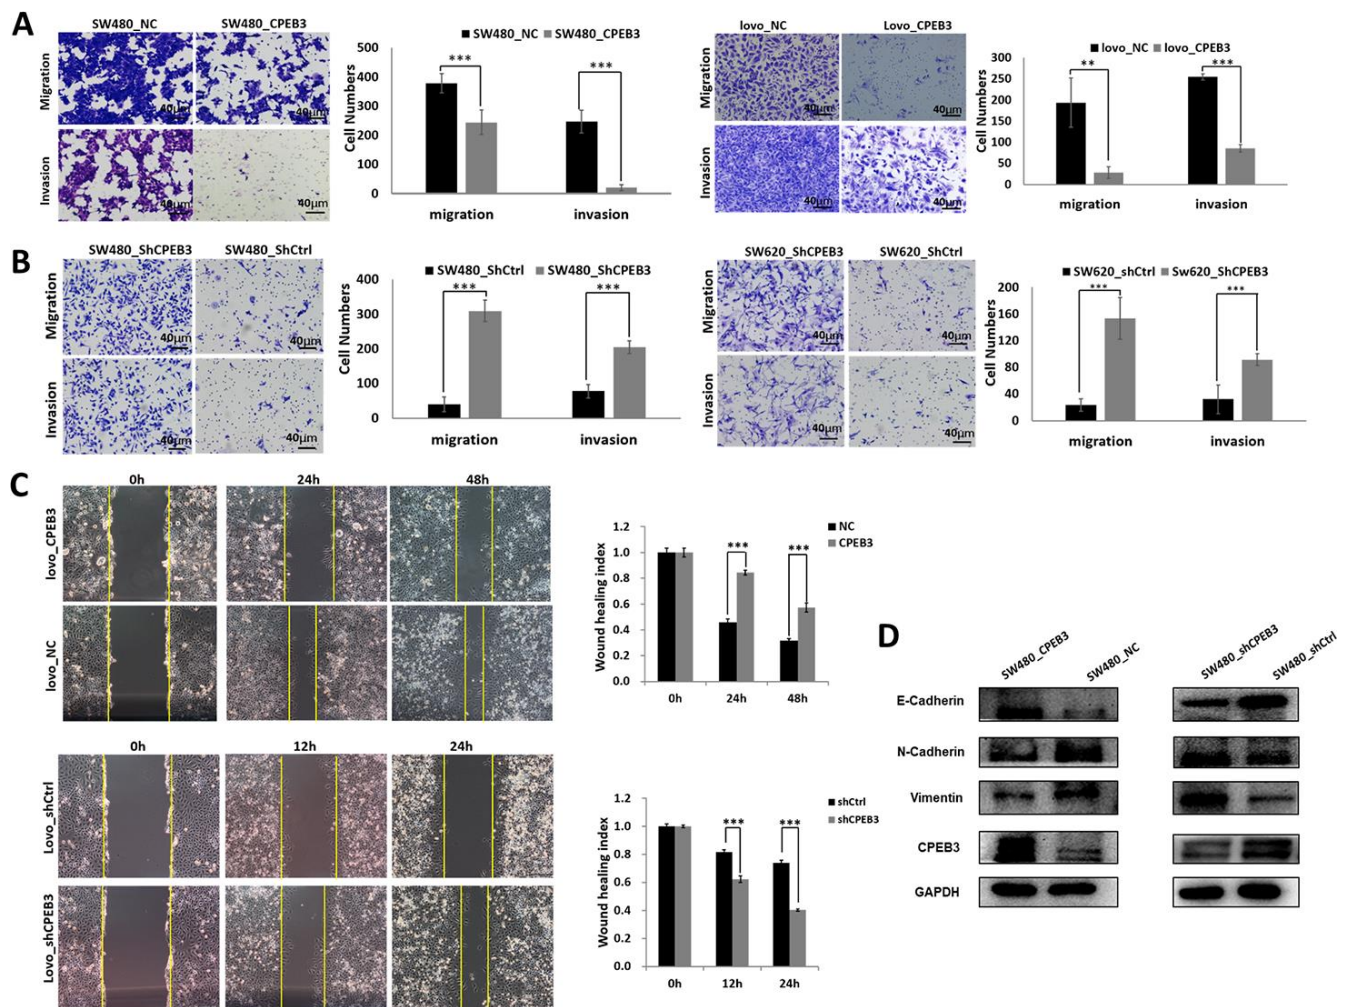

**Supplementary Figure 3. CPEB3 inhibits metastasis of human colorectal cancer cells.** (A) CPEB3 overexpression significantly suppressed migration and invasion capacity of SW480 and SW620 cells by transwell assays (original magnification,  $\times 400$ ). (B) CPEB3 knockdown promoted migration and invasion ability of SW480 and SW620 cells (original magnification,  $\times 400$ ). (C) In vitro wound healing assays showed that CPEB3 suppressed the migration ability of LoVo cells (original magnification,  $\times 100$ ). (\*\* $P < 0.01$ , \*\*\* $P < 0.001$ ). (D) Metastasis-related markers were further confirmed by Western blotting.
